RESEARCH ARTICLE

# Translation, cultural adaptation and validation of simplified Chinese version of the anterior cruciate ligament return to sport after injury (ACL-RSI) scale

Tianwu Chen<sup>1,2</sup>, Peng Zhang<sup>1,2</sup>, Yunxia Li<sup>1,2</sup>, Kate Webster<sup>3</sup>, Jian Zhang<sup>1,2</sup>, Wei Yao<sup>1,2</sup>, Yue Yin<sup>4</sup>, Chingchong Ai<sup>1,2</sup>, Shiyi Chen<sup>1,2\*</sup>

**1** Department of Sports Medicine and Arthroscopy, Huashan Hospital, Shanghai, China, **2** Sports Medicine Center, Fudan University, Shanghai, China, **3** Musculoskeletal Research Centre, La Trobe University, Victoria, Australia, **4** West Anhui University Health Vocational College, Luan, Anhui Province, China

\* [cshiyi@163.com](mailto:cshiyi@163.com)

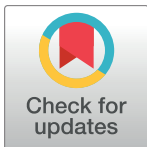

**OPEN ACCESS**

**Citation:** Chen T, Zhang P, Li Y, Webster K, Zhang J, Yao W, et al. (2017) Translation, cultural adaptation and validation of simplified Chinese version of the anterior cruciate ligament return to sport after injury (ACL-RSI) scale. PLoS ONE 12 (8): e0183095. <https://doi.org/10.1371/journal.pone.0183095>

**Editor:** Chunfeng Zhao, Mayo Clinic Minnesota, UNITED STATES

**Received:** March 13, 2017

**Accepted:** July 28, 2017

**Published:** August 17, 2017

**Copyright:** © 2017 Chen et al. This is an open access article distributed under the terms of the [Creative Commons Attribution License](https://creativecommons.org/licenses/by/4.0/), which permits unrestricted use, distribution, and reproduction in any medium, provided the original author and source are credited.

**Data Availability Statement:** All relevant data are within the paper and its Supporting Information files.

**Funding:** One author (2016YFC1100300, SYC; 2015AA033703, SYC) has received funding from the State Key Project of Research and Development project, and the National 863 Hi-tech Project.

**Competing interests:** The authors have declared that no competing interests exist.

## Abstract

### Purpose

To translate and cross-culturally adapt the anterior cruciate ligament-return to sport after injury (ACL-RSI) into simplified Chinese [ACL-RSI (Cn)].

### Method

In this diagnostic study, the translation, cross-culturally adaptation, and validation of the ACL-RSI was performed according to international guidelines. A total of 112 patients with ACL reconstruction participated in this study. All were capable of competitive sports before the injury and completed the Knee Injury and Osteoarthritis Outcome (KOOS), the International Knee Documentation Committee (IKDC), the Tampa Scale of Kinesiophobia (TSK), and the Tegner activity score. Forty-eight patients completed the ACL-RSI (Cn) twice within two weeks. The validity was tested using seven premade hypotheses. Internal consistency, reliability, and measurement error was assessed.

### Result

At meanly 15.6 months postoperative, 81 (72.3%) patients returned to sport, with 57 (50.9%) to competitive sport and 24 (21.4%) to recreational sport. Thirty-one (27.7%) patients didn't return to any sport, with 19 (17.0%) still had planned to return, and 12 (10.7%) gave up sport. The ACL-RSI (Cn) demonstrated excellent validity with all hypotheses confirmed. The outcome of ACL-RSI (Cn) was strongly correlated the KOOS subscale quality of life ( $r = 0.66$ ,  $p < 0.001$ ), the TSK ( $r = -0.678$ ,  $p < 0.001$ ), the Tegner score ( $r = 0.695$ ,  $p < 0.001$ ). There was statistic difference between cases returned ( $68.6 \pm 10.1$ ) and didn't return to sport ( $41.3 \pm 17.7$ ),  $p < 0.001$ ; between cases returned to competitive ( $71.1 \pm 8.9$ ) and recreational sport ( $62.9 \pm 10.5$ ), ( $P = 0.002$ ); between cases who planned to return ( $50.7 \pm 14.1$ ) and gave up sport ( $26.5 \pm 11.7$ ), ( $P < 0.001$ ). The internal consistency (Cronbach's  $\alpha = 0.96$ ) and test-retest reliability [intra-class correlation coefficient (ICC) = 0.90] was excellent. The

measurement error, floor and ceiling effect was satisfactory. Administration time was 3.2 minutes, and no item was missed.

## Conclusions

The ACL-RSI (Cn) scale was confirmed as a valid, reliable, and feasible tool for evaluating psychological factors influencing return to sport.

## Introduction

An anterior cruciate ligament (ACL) deficient knee always precludes active sports patients from strenuous activities, especially involving cutting and pivoting [1–6]. After the development of nearly one century, the ACL reconstruction is now routinely performed to restore knee stability with an ultimate goal to bring patients back to sport, in the best condition at their preinjury levels [7, 8].

In literature, the return to sport after ACL reconstruction was satisfactory for professional athletes playing basketball, American football, soccer and hockey, ranging from nearly 80% to over 95% [9–14]. While for general sport active population, the outcome was lower than expected. It was reported that two third patients had not returned to their preinjury levels by 12 months postoperative [15]. In further investigation, the researchers found that the overall rate of return to preinjury level sport was only 60% by two years after surgery [16]. In a systematic review and meta-analysis including 69 articles reporting on over 7500 participates, only 65% patients returned to the preinjury level at a mean of 40 months postoperative [17].

Traditionally, the physical condition was highly emphasised in postoperative rehabilitation [18–27]. Knee stability, muscle strength, and range of motion were usually used to decide whether they could resume sport or not. Interestingly, the knee function after rehabilitation was often good to excellent in most cases by current measurement, while the return to sport is sometimes disappointing. For the seemingly perplexing phenomenon, some researchers suggested that patients might be not well psychologically prepared to return to sport despite physically rehabilitated [28, 29]. Fear of reinjury was proved as a hindrance for returning to sport after ACL reconstruction [29]. In contrast, positive attitude was suggested to be correlated with the higher rate of returning to sport [30, 31].

In 2008, an Australian research group developed a 12-item English questionnaire named the ACL Return to Sport after Injury scale (ACL-RSI), which consisted of three psychological aspects: athletes' emotions, performance confidence, and risk appraisal [32]. Soon afterwards, the ACL-RSI was proved of efficacy in predicting the return to sport after ACL reconstruction. Now, the tool has been translated and cross-cultural adapted into several languages including Swedish, French, Dutch and Turkish. All versions demonstrated excellent reliability and validation [33–36].

In this diagnostic study, we tried to translate, cross-cultural adapt and validate the ACL-RSI into simplified Chinese.

## Methods and materials

The study was approved by the Huashan Institutional Review Board (HIRB), and verbal consent was gained from participants.

## Translation and cross-cultural adaptation procedure

In this diagnostic study, the ACL-RSI was translated and culturally adapted from English into simplified Chinese by one orthopaedic doctor, one sports medicine surgeon and one physical therapist after obtaining the permission from original author. All translators speak Chinese as their mother language and have good knowledge of both English and Chinese. After discussion on wording and phrasing with a college English teacher, the original version of ACL-RSI (Cn) was confirmed. Then, the translated scale was retranslated into English by two independent native English speakers who know Mandarin Chinese well and have no idea of the original scale.

In the next, a seven-investigator study team were formed to evaluate the translations and reached a consensus on the pretesting version ACL-RSI (Cn). The study group consisted of two senior sports medicine professors, one attending sports medicine doctor, one undergraduate student majoring in sports medicine rehabilitation and the three translators. Then, six patients (3 male, 3 female, mean age of 26.8 years) were included in a pretest. The patients were asked if they have any difficulty in answering the questions and making comments or giving some suggestions, by which we can refine the scale if necessary.

For measurement, a 10-centimeter visual analogue scale (VAS) with the graduation of 1 millimetre was used. The patients could score by ticking or dotting on the scale. The outcome was recorded in one hundred mark system.

## Validity

The ACL-RSI (Cn) was validated according to the COSMIN (Consensus-based Standards for the selection of health Measurement Instruments) international guidelines [37]. Patients with ACL reconstruction between Jan 2015 and September 2015 at our institute were enrolled in this study. The inclusion and exclusion criteria were presented in Table 1.

## Questionnaires

Another four questionnaires were applied in the validity testing of the ACL-RSI (Cn).

A purpose-specific questionnaire was firstly fulfilled by the patients, which includes their basic information, time from surgery, and current activity level by the Tegner score [38]. The validated Chinese version 2000 International Knee Documentation Committee (IKDC) subjective score was applied [39]. The 18 items questionnaire consisted of three aspects: symptoms, sports activities, and function. The validated Chinese version Knee Injury and Osteoarthritis Outcome Score (KOOS) was applied [40]. The KOOS consisted of five subscales, including pain, symptoms, activities of daily living (ADL), sport and recreation function (function), and knee-related quality of life (QoL). The Tampa Scale of Kinesiophobia (TSK), a 17-item questionnaire, was designed to measure fear of movement and potential reinjury during physical activities [41]. A four point Likert scale was used in each item with the total score

**Table 1. The Inclusion and exclusion criteria.**

| Inclusion criteria                                | Exclusion criteria               |
|---------------------------------------------------|----------------------------------|
| 16 years or older                                 | Revision surgery                 |
| ACL reconstruction between Jan 2015 and Sept 2015 | Multi-ligament surgery           |
| Capable of competitive sports preinjury           | Pre-surgery history              |
|                                                   | Grade III or IV cartilage lesion |
|                                                   | Subtotal or total meniscectomy   |
|                                                   | Injury or working compensation   |

<https://doi.org/10.1371/journal.pone.0183095.t001>

ranging from 17 to 68. The higher score indicates a high level of fear. The scale was also validated into Chinese recently.

### Return to sport

The activity levels were measured by the Tegner activity score. Besides current levels, the participants needed to mark their preinjury level by recalling. If the Tegner scores equalled, we defined that this patient had returned to sport at preinjury level. For patients who didn't return to sport, they need to answer whether they still planned to return; for patients who returned to sport, they needed to explain what kind of games they could play, competitive or recreational.

### Reliability

The first 60 patients were asked to fulfill the ACL-RSI (Cn) twice with a time interval of one to two weeks. Total score of the two tests was calculated. The test-retest reliability was evaluated by the intra-class correlation coefficient (ICC) using the two-way random model in an entire agreement pattern. The confidence interval was 95%. Reproducibility was considered to be "excellent" with ( $ICC > 0.80$ ), "good" ( $0.60 < ICC \leq 0.80$ ), "fair" ( $ICC \leq 0.40$ ), or poor ( $ICC \leq 0.20$ ). The measurement error was assessed by the Limits of Agreement using Bland and Altman plot.

### Feasibility

The feasibility was determined by the response rate and fulfilling time of the ACL-RSI (Cn). The fulfilling time was documented in a minute by responders.

### Floor and ceiling effects

Floor or ceiling effects indicate that the scale may fail in measuring extreme values. For each item, the percentage of patients who scored the lowest and the highest outcomes were documented. The descriptive data were also calculated, which included the mean value and standard deviation. Floor or ceiling effects were confirmed if more than 15% of patients had scored at the limits of the scale.

### Internal consistency

The internal consistency was assessed by the Cronbach's alpha coefficient, which was considered to be "excellent" if  $\alpha > 0.90$ . The correlation between every two items and each item to total score were also calculated. Structural validity was tested by factor analysis using principal components method with maximum variance rotation. The analysis could determine whether there was one construct or not, which laid the theoretical foundation to calculate the total score. Eigenvalue  $> 1$  was the extraction criteria.

### Construct validity

Seven hypotheses proposed by the investigators to test the construct validity

1. Patients who returned to sport had higher ACL-RSI (Cn) score than those who didn't.
2. Patients who returned to competitive sport score had higher ACL-RSI (Cn) score than those back to the recreational sport.
3. Patients who planned to return to sport had higher ACL-RSI (Cn) score than those who didn't.

4. Patients who scored high on the Tegner score had high ACL-RSI (Cn) score. The Tegner activity score was highly correlated with ACL-RSI (Cn).
5. Patients who scored high on the subjective IKDC had high ACL-RSI (Cn) score. The subscale sports activity was highly correlated with ACL-RSI (Cn).
6. Patients who scored highly on the KOOS had high ACL-RSI (Cn) score. The subscales QoL and function were each highly correlated with ACL-RSI (Cn).
7. Patients who scored high on the TSK had low ACL-RSI (Cn) score. The outcomes of the two scales were in a negative correlation.

The construct validity was tested by the Pearson's correlation between ACL-RSI and the TSK, the Tegner score, the subscales of the subjective IKDC and the KOOS. The correlation could be considered in five degrees: "very strong" ( $.80 < r < 1.0$ ), "strong" ( $.60 < r < 0.79$ ), "moderate" ( $.40 < r < 0.59$ ), "weak" ( $.20 < r < 0.39$ ), "very weak" ( $.00 < r < 0.19$ ). Discriminant validity was tested by the first three hypotheses using the Mann-Whitney test.  $P < 0.05$  was considered as statistical significance. The analyses were performed by SPSS 19.0 and Medcalc 15.6.

## Results

### Cross-cultural adaptation

The ACL-RSI (Cn) and retranslated scale did not cause any significant grammar or wording problem. The word "fearful" and "afraid", respectively from item 7 and 9, were synonyms to some extent in Chinese. To distinguish them, we translated the "fearful" into "rang nin wei ju" and converted "play your sport" into the subject of the interrogative sentence. In this way, item 7 was used to assess how "injuring your knee" impressed patients. In contrast, the afraid in item 9 was translated into "hai pa", evaluating patients' inner feeling toward accidental injury. As a good example, one patient could find "playing your sport" fearful after ACL reconstruction, but they didn't afraid of that.

### Study participants

Under criteria, the study finally included 185 patients. Three patients were unavailable in contact, and 62 patients rejected investigation including three failed cases. A total of 120 patient agreed to join in the study, while 112 patients returned final outcomes. Among those who replied, 82 were male, the mean age is  $26.6 \pm 7.6$  (16 to 48) years, and the mean BMI was  $24.2 \pm 3.9$  (17.9 to 30.1). All patients were capable of competitive sport preinjury. The average follow-up time was  $15.6 \pm 1.9$  (11 to 20) months.

### Return to sport

Eighty-one (72.3%, 81/112) patients returned to sport, in which 57 (50.9%, 57/112) patients returned to the competitive sport, and 24 (21.4%, 24/112) patients returned to the recreational sport. Thirty-one (27.7%, 31/112) patients didn't return to any kind sport. Among them, 19 (17.0%, 19/112) patients still had the plan to return, while 12 (10.7%, 12/112) patients no longer wanted to return to sport. Fifty-one (45.5%, 51/112) patients returned to sport at preinjury level.

### Internal consistency

The principal component analysis demonstrated the unidimensionality with an eigenvalue of 8.3. The sole factor explained 68.8% of the whole content. The internal consistency of the

ACL-RSI (Cn) was excellent with a Cronbach’s  $\alpha$  of 0.96, which demonstrated very strong correlation among the 12 items. The inter-item correlations were strong, with a mean value of 0.64 (from 0.59 to 0.71). The correlations between each item and the total score were very strong, with a mean value of 0.83 (from 0.65 to 0.89).

### Construct validity

All seven hypotheses were confirmed. The ACL-RSI (Cn) demonstrated significant correlation with all reference tools except the KOOS-ADL. The correlations were weak with the subscales including IKDC symptom and KOOS-symptom. The Strong negative correlation was observed with the TSK. Strong positive correlation was found with the KOOS-QoL. The strongest negative correlation was found with the Tegner score. Strong positive correlation was also observed with the KOOS-QoL. (Table 2)

The discriminant validity was excellent. The score of ACL-RSI (Cn) was respectively  $68.6 \pm 10.1$  (from 45.1 to 87.1) or  $41.3 \pm 17.7$  (from 9.8 to 72.2) in patients who had returned or had not returned to sport, ( $P < 0.001$ ); respectively  $71.1 \pm 8.9$  (from 47.9 to 87.1) or  $62.9 \pm 10.5$  (from 45.1 to 82.3) in patients who had returned to competitive or recreational sport, ( $P = 0.002$ ); respectively  $50.7 \pm 14.1$  (from 22.9 to 72.2) or  $26.5 \pm 11.7$  (from 9.8 to 45.2) in patients who planned to return or gave up sport, ( $P < 0.001$ ). (Figs 1 and 2)

### Reliability

The test–retest reliability of the ACL-RSI (Cn) was excellent. Forty-eight patients again answered the ACL-RSI (Cn). The mean total score of the ACL-RSI at first test was  $63.1 \pm 17.8$  and  $60.6 \pm 17.6$  at the second test. The intra-class correlation coefficient (ICC) was 0.90 (from 0.82 to 0.94). The measurement error was satisfactory with Bland and Altman’s plot showing good agreement. (Fig 3).

### The floor and ceiling effect

Floor and ceiling effects for each item were acceptable. For floor effect, the percentage of score zero for each question ranged from 0 to 6.3%. For ceiling effect, the percentage of 100 scores

**Table 2. Mean values of scales and correlations between the ACL-RSI (Cn) scale and other scales.**

| Scale           | Mean Score (SD) | Correlation with ACL-RSI(Cn) | P-value   |
|-----------------|-----------------|------------------------------|-----------|
| ACL-RSI (Cn)    | 61.3 ± 17.8     | -                            | -         |
| IKDC-symptom    | 31.6 ± 3.9      | r = 0.376                    | p < 0.001 |
| IKDC-function   | 8.5 ± 0.9       | r = 0.483                    | p < 0.001 |
| IKDC-sports     | 38.3 ± 1.7      | r = 0.408                    | p < 0.001 |
| KOOS-pain       | 92.6 ± 6.1      | r = 0.463                    | p < 0.001 |
| KOOS-symptom    | 89.6 ± 8.4      | r = 0.265                    | p = 0.005 |
| KOOS-ADL*       | 96.5 ± 3.4      | r = 0.167                    | p = 0.078 |
| KOOS-function** | 87.3 ± 8.7      | r = 0.520                    | p < 0.001 |
| KOOS-QoL#       | 82.2 ± 10.2     | r = 0.660                    | p < 0.001 |
| TSK##           | 41.3 ± 11.0     | r = -0.678                   | p < 0.001 |
| Tegner Score    | 6.2 ± 2.0       | r = 0.695                    | p < 0.001 |

\*Activities of Daily Life

\*\*Sport and Recreation Function

#Knee-related Quality of Life

##Tempa Scale of Kinesiophobia

<https://doi.org/10.1371/journal.pone.0183095.t002>

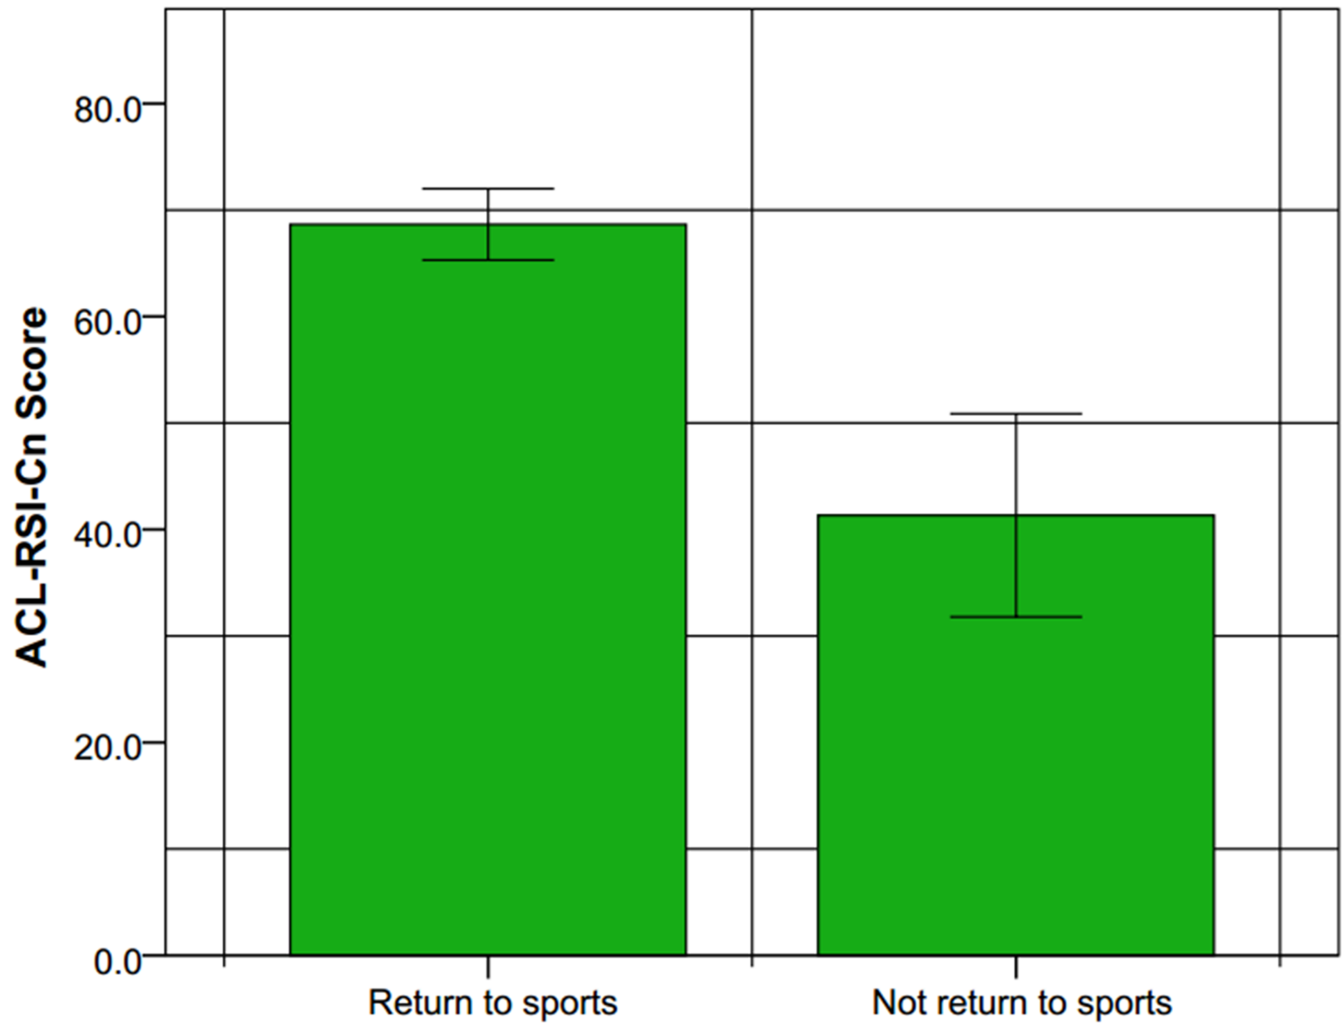

**Fig 1. Scores of the ACL-RSI scale at a mean of 15.6 months postoperative, between cases returned to sport and those didn't return.** There was the significant statistical difference, ( $P < 0.001$ ).

<https://doi.org/10.1371/journal.pone.0183095.g001>

for each question ranged from 0 to 5.4%. The overall mean score was  $63.1 \pm 17.8$ , which was also satisfactory.

### Feasibility

No item of the ACL-RSI (Cn) was missed. The average fulfilling time of the questionnaire was 3.2 minutes.

### Discussion

The desire of a return to sport is always the impetus of ACL reconstruction for most patients. And such desire also influences doctors' decisions on patient selection. Albeit the knee function in most patients has been physically recovered, the return to sport rate was not ideal from literature [16, 17, 42, 43]. One explanation was that the lower rate of return to sport might be due to the inferior psychological preparation of patients. Fear of reinjury, negative emotion, shifts in priority, and individual personalities have been reported in association with



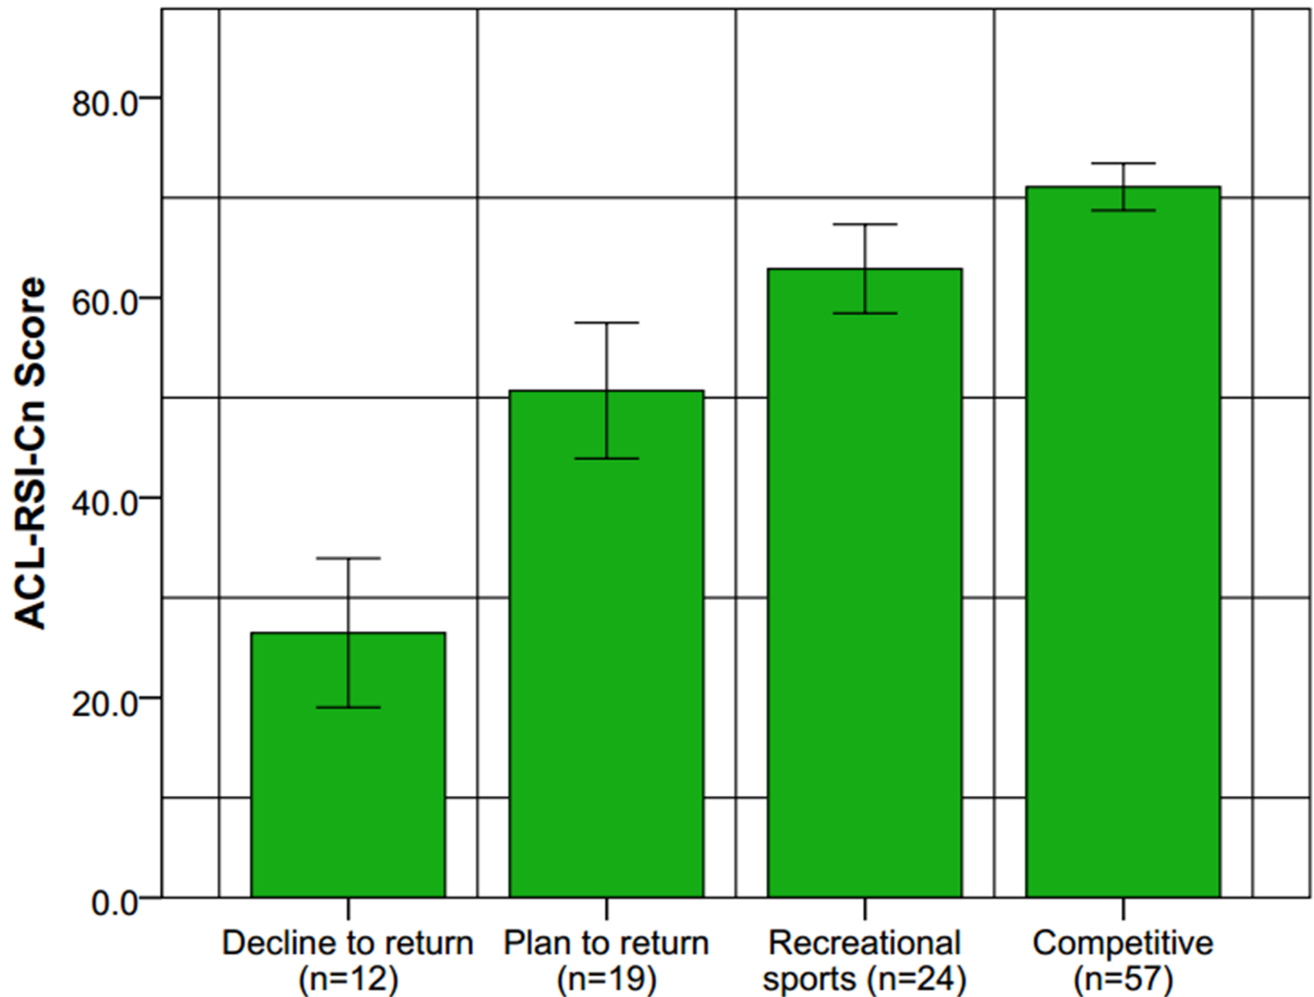

**Fig 2. Scores of the ACL-RSI scale at a mean of 15.6 months postoperative of cases returned to the competitive sport, to recreational sport, planned to return, and gave up sport.** There was the significant statistical difference between cases returned to the competitive sport and those to recreational sport, ( $P = 0.002$ ); between cases planned to return to sport and those gave up, ( $P < 0.001$ ).

<https://doi.org/10.1371/journal.pone.0183095.g002>

unsatisfactory return to sport [28–30]. Specifically, fear of injury has been proved as a definite hindrance by several investigators using different methods [29].

In previous research of psychological factors related to return to sport after the ACL injury, several tools have been applied, including the Knee-Self-Efficacy Scale (K-SES) [44], the Emotional Responses of Athletes to Injury Questionnaire (ERAIQ) [45, 46], the Tampa Scale of Kinesiophobia (TSK) [47], and an Italian psychovitality scale [48]. While these tools were not developed for patients with ACL reconstruction. The ACL-RSI, a 12-item scale measuring emotions, confidence in performance and risk appraisal of athletes, was specially designed by Webster et al. to evaluate psychological impacts on returning to sport after ACL reconstruction. It has been proved with good efficacy in following studies. And the scale also has been successfully translated into several languages.

During our clinical work, it has long been noticed that quite a few patients somehow have failed to return to sport, especially at their preinjury level despite good to excellent knee function. By interview conversation, we found that some patients were afraid of reinjury and the whole process of surgery and postoperative rehabilitation was fearful to them. Also, the shift of



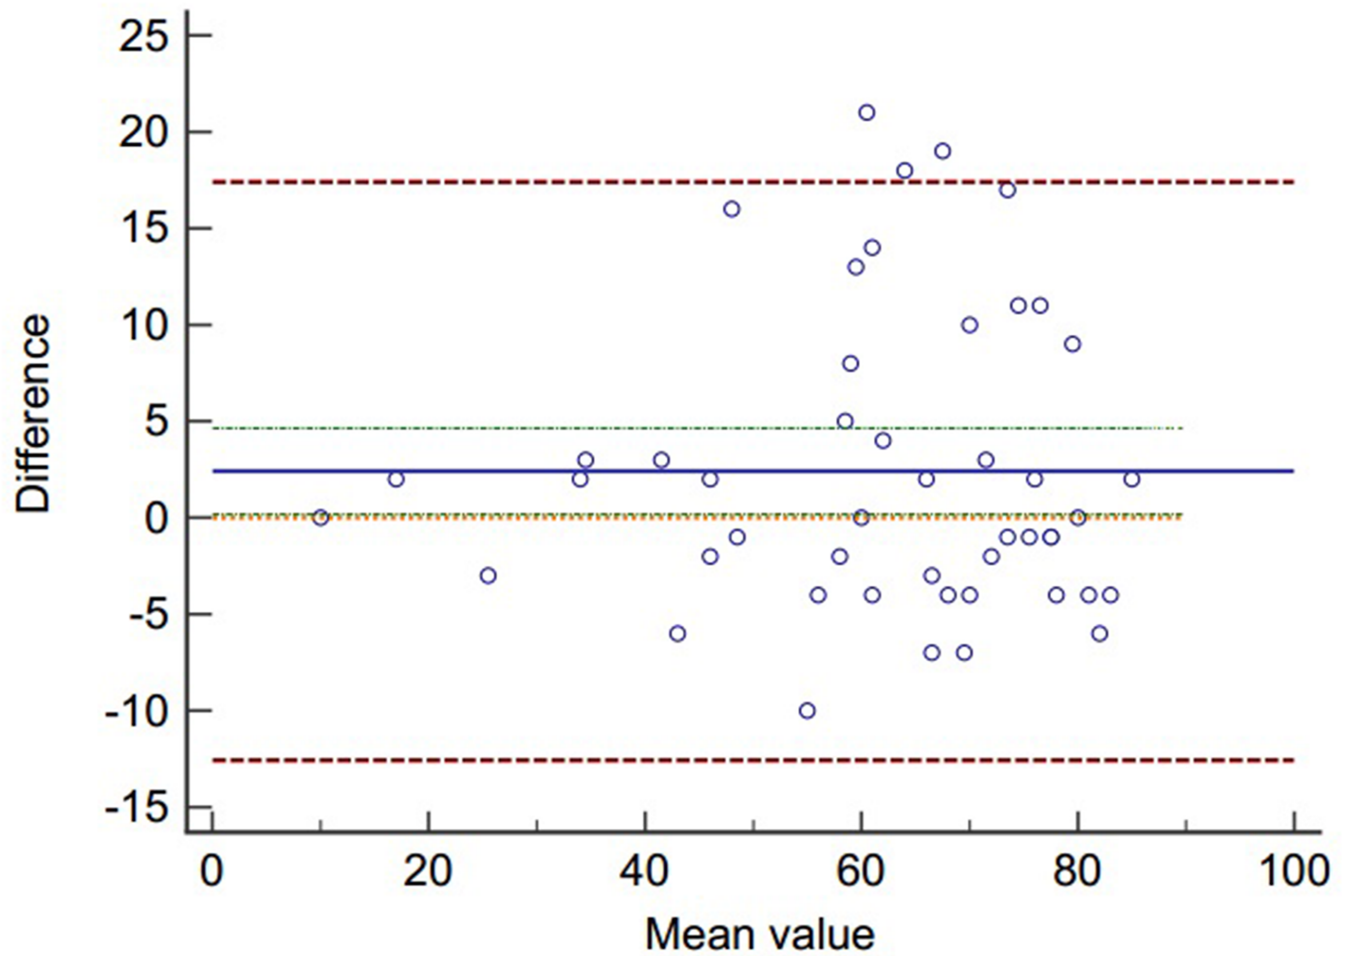

**Fig 3. Bland and Altman's diagram are showing good agreement between the two measurements.**

<https://doi.org/10.1371/journal.pone.0183095.g003>

priority made them more rational than emotional in participating fierce body contact games. Some patients expressed that they were no longer confident or passionate enough on the same field and decide to modify their sport activities to a lower intensity, i.e. from competitive to recreational sport.

Traditional measurement tools used in follow-up after ACL reconstruction mainly focused on the evaluation of clinical symptoms and function of the affected limb (the KOOS, the IKDC subjective score), as well as the patient's activity level (Tegner Activity Score). While their measuring spectrum failed to include the patients' psychological conditions. Recently, it was reported that the returning to sports should be delayed at nearly two years postoperative to reduce the incidence of second ACL injuries. For the incidence rate in high-level athletes within two years postoperative, it might be due to the insufficient biological and functional recovery of the affected knee as the researchers suggested, while psychological factors could also be contributive to returning to sports from our academic point.

For quantitative investigation of this issue, an efficient tool for psychological measurement is needed. And it will be a great help to doctors, physical therapists, and the patients of ACL reconstruction, who can eventually get safe and predictive clearance to return to sport when they are fully prepared, both physically and psychologically. Therefore we decided to translate the ACL-RSI into simplified Chinese. The simplified Chinese version of the ACL-RSI was

proved to be a reliable, valid and feasible questionnaire to assess psychological factors of the patients after ACL reconstruction.

Although the ACL-RSI (Cn) consisted of three psychological aspects including emotion, confidence in the performance and risk appraisal, the factor analysis indicated that it was still unidimensional. In other words, the three psychological factors cannot be separated. Also, the high inter-item correlation also revealed its strong internal consistency.

Four questionnaires were used in the validation. The simplified Chinese version IKDC was a validated tool widely applied by Chinese sport medicine doctors and orthopaedic surgeons. The Tegner activity score, a simple but useful tool, was routinely used in China to evaluate the activity level of patients. The simplified Chinese version KOOS was validated in 2006. As a disease-specific instrument for knee OA, the KOOS was developed from the Western Ontario and McMaster Universities Osteoarthritis Index (WOMAC) and was designed for younger and more active patients. All questionnaires were applied in other studies completed or still ongoing in our institute. The simplified Chinese version TSK was validated in patients with low back pain after cultural adaptation. Kinesiophobia means the fear of movement or (re)injury, which has been proved as a hindrance of return to sport after ACL reconstruction. Therefore, we used the simplified Chinese TSK to test the construct validation of ACL-RSI. In this study, the correlation between ACL-RSI and the KOOS subscale QoL was strong, which was also found in the Swedish version, French version. In the Turkish version, the correlation between ACL-RSI and KOOS-QoL was the highest one. From our perspective, this is due to the intrinsic property of KOOS-QoL, which involves risk appraisal management and some psychological factors like confidence and self-awareness. The strongest correlation was observed with the Tegner score, which solidly confirmed the psychological impact on sport activity level.

The ACL-RSI showed excellent discriminant validity, (Fig 1). A significant difference was found between the patients who had returned to sport and those who hadn't. The outcomes of patients who returned to the competitive sport were higher than those only took part in a recreational sport usually like jogging or cycling. Among the patients who didn't return to sport, we separated those who still had the plan to return and those who gave up sport, at least on the investigating moment. A significant difference was also found between the two groups.

The reliability of the ACL-RSI scale has been reported of satisfactory outcomes in previous studies. The test-retest reliability of simplified Chinese version ACL-RSI was high. The good agreement shown by the Bland and Altman plot indicated the measurement error is satisfactory.

One limitation of this study is the participating rate. Only 61% of the included patients agreed to participate and eventually returned available data. For the test-retest reliability, 60 patients were primarily supposed to fulfill the ACL-RSI twice, while only 48 patients (80%, 48/60) returned the outcome. One explanation might be that the patients have found tedious in fulfilling the questionnaires. Some of them participated in another study, in which they had already finished some paperwork. Frankly, patients needed to answer at maximum over one hundred questions in this study. In a self-voluntary rather than mandatory or financial rewarded mode, we have been much appreciated that.

The included patients were all capable of the competitive sport before the injury. This sample selection might be criticised that it could not represent all patients with ACL reconstruction, while the ACL reconstruction should have been a surgery for patients who need high-level sport activity.

## Conclusion

The simplified Chinese version ACL-RSI scale was confirmed as a valid, reliable, and feasible tool for evaluating psychological factors influencing return to sport. This tool may help

Chinese ACL reconstructed population both psychologically and physically ready to return to sport.

## Supporting information

**S1 Appendix. Simplified Chinese version of the Anterior Cruciate Ligament Return to Sport after Injury (ACL-RSI) scale.**

(PDF)

**S2 Appendix. The Anterior Cruciate Ligament Return to Sport after Injury (ACL-RSI) scale-Original Version.**

(PDF)

**S3 Appendix. The Underlying participant-level data.**

(PDF)

## Acknowledgments

The authors are very grateful for Mr Allan, Mr. Schramm, and Miss Xu, who voluntarily helped the retranslation process.

## Author Contributions

**Conceptualization:** Tianwu Chen, Yunxia Li, Shiyi Chen.

**Data curation:** Wei Yao, Chingchong Ai, Shiyi Chen.

**Formal analysis:** Yunxia Li, Wei Yao, Yue Yin, Chingchong Ai, Shiyi Chen.

**Funding acquisition:** Shiyi Chen.

**Investigation:** Tianwu Chen, Yunxia Li, Jian Zhang, Wei Yao.

**Methodology:** Yunxia Li.

**Project administration:** Peng Zhang.

**Resources:** Tianwu Chen, Peng Zhang, Kate Webster, Jian Zhang, Wei Yao, Yue Yin.

**Software:** Tianwu Chen, Chingchong Ai.

**Supervision:** Yue Yin, Shiyi Chen.

**Validation:** Tianwu Chen, Yunxia Li, Jian Zhang, Shiyi Chen.

**Visualization:** Yunxia Li, Shiyi Chen.

**Writing – original draft:** Tianwu Chen.

**Writing – review & editing:** Tianwu Chen, Yue Yin, Shiyi Chen.

## References

1. Almqvist KF, Willaert P, De Brabandere S, Criel K, Verdonk R. A long-term study of anterior cruciate ligament allograft reconstruction. *Knee Surg Sports Traumatol Arthrosc.* 2009; 17(7):818–22. <https://doi.org/10.1007/s00167-009-0808-y> PMID: 19421736
2. Barenus B, Ponzer S, Shalabi A, Bujak R, Norlen L, Eriksson K. Increased risk of osteoarthritis after anterior cruciate ligament reconstruction: a 14-year follow-up study of a randomized controlled trial. *Am J Sports Med.* 2014; 42(5):1049–57. <https://doi.org/10.1177/0363546514526139> PMID: 24644301
3. Bollen S, Salmon L. Letters to the Editor \* Author's Response. *Am J Sports Med.* 2006; 35(3):493–.

4. Bottoni CR, Smith EL, Shaha J, Shaha SS, Raybin SG, Tokish JM, et al. Autograft Versus Allograft Anterior Cruciate Ligament Reconstruction: A Prospective, Randomized Clinical Study With a Minimum 10-Year Follow-up. *Am J Sports Med.* 2015; 43(10):2501–9. <https://doi.org/10.1177/0363546515596406> PMID: 26311445
5. Cohen M, Amaro JT, Ejnisman B, Carvalho RT, Nakano KK, Peccin MS, et al. Anterior Cruciate Ligament Reconstruction After 10 to 15 Years: Association Between Meniscectomy and Osteoarthritis. *Arthroscopy.* 2007; 23(6):629–34. <https://doi.org/10.1016/j.arthro.2007.03.094> PMID: 17560477
6. Crawford SN, Waterman BR, Lubowitz JH. Long-term failure of anterior cruciate ligament reconstruction. *Arthroscopy.* 2013; 29(9):1566–71. <https://doi.org/10.1016/j.arthro.2013.04.014> PMID: 23820260
7. Kim HS, Seon JK, Jo AR. Current trends in anterior cruciate ligament reconstruction. *Knee Surg Relat Res.* 2013; 25(4):165–73. <https://doi.org/10.5792/ksrr.2013.25.4.165> PMID: 24368993
8. Vaishya R, Agarwal AK, Ingole S, Vijay V. Current Trends in Anterior Cruciate Ligament Reconstruction: A Review. *Cureus.* 2015; 7(11):e378. <https://doi.org/10.7759/cureus.378> PMID: 26697280
9. Busfield BT, Kharrazi FD, Starkey C, Lombardo SJ, Seegmiller J. Performance outcomes of anterior cruciate ligament reconstruction in the National Basketball Association. *Arthroscopy.* 2009; 25(8):825–30. <https://doi.org/10.1016/j.arthro.2009.02.021> PMID: 19664500
10. Carey JL, Huffman GR, Parekh SG, Sennett BJ. Outcomes of anterior cruciate ligament injuries to running backs and wide receivers in the National Football League. *Am J Sports Med.* 2006; 34(12):1911–7. <https://doi.org/10.1177/0363546506290186> PMID: 16870822
11. Erickson BJ, Harris JD, Cole BJ, Frank RM, Fillingham YA, Ellman MB, et al. Performance and Return to Sport After Anterior Cruciate Ligament Reconstruction in National Hockey League Players. *Orthop J Sports Med.* 2014; 2(9):2325967114548831.
12. Erickson BJ, Harris JD, Cvetanovich GL, Bach BR, Bush-Joseph CA, Abrams GD, et al. Performance and Return to Sport After Anterior Cruciate Ligament Reconstruction in Male Major League Soccer Players. *Orthop J Sports Med.* 2013; 1(2):2325967113497189.
13. Erickson BJ, Harris JD, Heninger JR, Frank R, Bush-Joseph CA, Verma NN, et al. Performance and return-to-sport after ACL reconstruction in NFL quarterbacks. *Orthopedics.* 2014; 37(8):e728–34. <https://doi.org/10.3928/01477447-20140728-59> PMID: 25102509
14. Albright JP, Powell JW, Martindale A, Black R, Crowley E, Schmidt P, et al. Injury patterns in big ten conference football. *Am J Sports Med.* 2004; 32(6):1394–404. <https://doi.org/10.1177/0363546504264159> PMID: 15310563
15. Ardern CL, Webster KE, Taylor NF, Feller JA. Return to the preinjury level of competitive sport after anterior cruciate ligament reconstruction surgery: two-thirds of patients have not returned by 12 months after surgery. *Am J Sports Med.* 2011; 39(3):538–43. <https://doi.org/10.1177/0363546510384798> PMID: 21098818
16. Ardern CL, Taylor NF, Feller JA, Whitehead TS, Webster KE. Sports participation 2 years after anterior cruciate ligament reconstruction in athletes who had not returned to sport at 1 year: a prospective follow-up of physical function and psychological factors in 122 athletes. *Am J Sports Med.* 2015; 43(4):848–56. <https://doi.org/10.1177/0363546514563282> PMID: 25583757
17. Ardern CL, Taylor NF, Feller JA, Webster KE. Fifty-five per cent return to competitive sport following anterior cruciate ligament reconstruction surgery: an updated systematic review and meta-analysis including aspects of physical functioning and contextual factors. *Br J Sports Med.* 2014; 48(21):1543–52. <https://doi.org/10.1136/bjsports-2013-093398> PMID: 25157180
18. Hertel P, Behrend H, Cierpinski T, Musahl V, Widjaja G. ACL reconstruction using bone-patellar tendon-bone press-fit fixation: 10-year clinical results. *Knee Surg Sports Traumatol Arthrosc.* 2005; 13(4):248–55. <https://doi.org/10.1007/s00167-004-0606-5> PMID: 15690197
19. Hui C, Salmon LJ, Kok A, Maeno S, Linklater J, Pinczewski LA. Fifteen-year outcome of endoscopic anterior cruciate ligament reconstruction with patellar tendon autograft for "isolated" anterior cruciate ligament tear. *Am J Sports Med.* 2011; 39(1):89–98. <https://doi.org/10.1177/0363546510379975> PMID: 20962336
20. Inderhaug E, Strand T, Fischer-Bredenbeck C, Solheim E. Long-term results after reconstruction of the ACL with hamstrings autograft and transtibial femoral drilling. *Knee Surg Sports Traumatol Arthrosc.* 2013; 21(9):2004–10. <https://doi.org/10.1007/s00167-012-2330-x> PMID: 23223948
21. Leys T, Salmon L, Waller A, Linklater J, Pinczewski L. Clinical Results and Risk Factors for Reinjury 15 Years After Anterior Cruciate Ligament Reconstruction: A Prospective Study of Hamstring and Patellar Tendon Grafts. *Am J Sports Med.* 2012; 40(3):595–605. <https://doi.org/10.1177/0363546511430375> PMID: 22184280
22. Oiestad BE, Holm I, Aune AK, Gunderson R, Myklebust G, Engebretsen L, et al. Knee Function and Prevalence of Knee Osteoarthritis After Anterior Cruciate Ligament Reconstruction: A Prospective

- Study With 10 to 15 Years of Follow-up. *Am J Sports Med.* 2010; 38(11):2201–10. <https://doi.org/10.1177/0363546510373876> PMID: 20713644
23. Risberg MA, Oiestad BE, Gunderson R, Aune AK, Engebretsen L, Culvenor A, et al. Changes in Knee Osteoarthritis, Symptoms, and Function After Anterior Cruciate Ligament Reconstruction: A 20-Year Prospective Follow-up Study. *Am J Sports Med.* 2016; 44(5):1215–24. <https://doi.org/10.1177/0363546515626539> PMID: 26912282
  24. Roe J, Pinczewski LA, Russell VJ, Salmon LJ, Kawamata T, Chew M. A 7-year follow-up of patellar tendon and hamstring tendon grafts for arthroscopic anterior cruciate ligament reconstruction: differences and similarities. *Am J Sports Med.* 2005; 33(9):1337–45. <https://doi.org/10.1177/0363546504274145> PMID: 16002487
  25. Shelbourne KD, Gray T. Minimum 10-Year Results After Anterior Cruciate Ligament Reconstruction: How the Loss of Normal Knee Motion Compounds Other Factors Related to the Development of Osteoarthritis After Surgery. *Am J Sports Med.* 2009; 37(3):471–80. <https://doi.org/10.1177/0363546508326709> PMID: 19059893
  26. Thompson S, Salmon L, Waller A, Linklater J, Roe J, Pinczewski L. Twenty-year outcomes of a longitudinal prospective evaluation of isolated endoscopic anterior cruciate ligament reconstruction with patellar tendon autografts. *Am J Sports Med.* 2015; 43(9):2164–74. <https://doi.org/10.1177/0363546515591263> PMID: 26187130
  27. Webster KE, Feller JA, Hartnett N, Leigh WB, Richmond AK. Comparison of Patellar Tendon and Hamstring Tendon Anterior Cruciate Ligament Reconstruction: A 15-Year Follow-up of a Randomized Controlled Trial. *Am J Sports Med.* 2016; 44(1):83–90. <https://doi.org/10.1177/0363546515611886> PMID: 26578718
  28. Ardern CL, Osterberg A, Tagesson S, Gauffin H, Webster KE, Kvist J. The impact of psychological readiness to return to sport and recreational activities after anterior cruciate ligament reconstruction. *Br J Sports Med.* 2014; 48(22):1613–9. <https://doi.org/10.1136/bjsports-2014-093842> PMID: 25293342
  29. Ardern CL, Taylor NF, Feller JA, Webster KE. Fear of re-injury in people who have returned to sport following anterior cruciate ligament reconstruction surgery. *J Sci Med Sport.* 2012; 15(6):488–95. <https://doi.org/10.1016/j.jsams.2012.03.015> PMID: 22695136
  30. Christino MA, Fleming BC, Machan JT, Shalvoy RM. Psychological Factors Associated With Anterior Cruciate Ligament Reconstruction Recovery. *Orthop J Sports Med.* 2016; 4(3):2325967116638341.
  31. Brewer BW, Cornelius AE, Sklar JH, Van Raalte JL, Tennen H, Armeli S, et al. Pain and negative mood during rehabilitation after anterior cruciate ligament reconstruction: a daily process analysis. *Scand J Med Sci Sports.* 2006;061120070736008
  32. Webster KE, Feller JA, Lambros C. Development and preliminary validation of a scale to measure the psychological impact of returning to sport following anterior cruciate ligament reconstruction surgery. *Phys Ther Sport.* 2008; 9(1):9–15. <https://doi.org/10.1016/j.ptsp.2007.09.003> PMID: 19083699
  33. Bohu Y, Klouche S, Lefevre N, Webster K, Herman S. Translation, cross-cultural adaptation and validation of the French version of the Anterior Cruciate Ligament-Return to Sport after Injury (ACL-RSI) scale. *Knee Surg Sports Traumatol Arthrosc.* 2015; 23(4):1192–6. <https://doi.org/10.1007/s00167-014-2942-4> PMID: 24676789
  34. Harput G, Tok D, Ulusoy B, Eraslan L, Yildiz TI, Turgut E, et al. Translation and cross-cultural adaptation of the anterior cruciate ligament-return to sport after injury (ACL-RSI) scale into Turkish. *Knee Surg Sports Traumatol Arthrosc.* 2016. Epub 2016/08/20.
  35. Kvist J, Osterberg A, Gauffin H, Tagesson S, Webster K, Ardern C. Translation and measurement properties of the Swedish version of ACL-Return to Sports after Injury questionnaire. *Scand J Med Sci Sports.* 2013; 23(5):568–75. <https://doi.org/10.1111/j.1600-0838.2011.01438.x> PMID: 22257241
  36. Slagers AJ, Reininga IH, van den Akker-Scheek I. The Dutch language anterior cruciate ligament return to sport after injury scale (ACL-RSI)—validity and reliability. *J Sports Sci.* 2017; 35(4):393–401. <https://doi.org/10.1080/02640414.2016.1167230> PMID: 27079625
  37. Mokkink LB, Terwee CB, Patrick DL, Alonso J, Stratford PW, Knol DL, et al. The COSMIN checklist for assessing the methodological quality of studies on measurement properties of health status measurement instruments: an international Delphi study. *Qual Life Res.* 2010; 19(4):539–49. <https://doi.org/10.1007/s11136-010-9606-8> PMID: 20169472
  38. Huang H, Zhang D, Jiang Y, Yang J, Feng T, Gong X, et al. Translation, Validation and Cross-Cultural Adaptation of a Simplified-Chinese Version of the Tegner Activity Score in Chinese Patients with Anterior Cruciate Ligament Injury. *PLoS One.* 2016; 11(5):e0155463. <https://doi.org/10.1371/journal.pone.0155463> PMID: 27186880
  39. Fu SN, Chan YH. Translation and validation of Chinese version of International Knee Documentation Committee Subjective Knee Form. *Disabil Rehabil.* 2011; 33(13–14):1186–9. <https://doi.org/10.3109/09638288.2010.524274> PMID: 20969433

40. Xie F, Li SC, Roos EM, Fong KY, Lo NN, Yeo SJ, et al. Cross-cultural adaptation and validation of Singapore English and Chinese versions of the Knee injury and Osteoarthritis Outcome Score (KOOS) in Asians with knee osteoarthritis in Singapore. *Osteoarthritis Cartilage*. 2006; 14(11):1098–103. <https://doi.org/10.1016/j.joca.2006.05.005> PMID: 16814575
41. Wei X, Xu X, Zhao Y, Hu W, Bai Y, Li M. The Chinese version of the Tampa Scale for Kinesiophobia was cross-culturally adapted and validated in patients with low back pain. *J Clin Epidemiol*. 2015; 68(10):1205–12. <https://doi.org/10.1016/j.jclinepi.2015.07.003> PMID: 26169840
42. Ardern CL, Taylor NF, Feller JA, Webster KE. Return-to-sport outcomes at 2 to 7 years after anterior cruciate ligament reconstruction surgery. *Am J Sports Med*. 2012; 40(1):41–8. <https://doi.org/10.1177/0363546511422999> PMID: 21946441
43. Ardern CL, Webster KE, Taylor NF, Feller JA. Return to sport following anterior cruciate ligament reconstruction surgery: a systematic review and meta-analysis of the state of play. *Br J Sports Med*. 2011; 45(7):596–606. <https://doi.org/10.1136/bjism.2010.076364> PMID: 21398310
44. Thomee P, Wahrborg P, Borjesson M, Thomee R, Eriksson BI, Karlsson J. A new instrument for measuring self-efficacy in patients with an anterior cruciate ligament injury. *Scand J Med Sci Sports*. 2006; 16(3):181–7. <https://doi.org/10.1111/j.1600-0838.2005.00472.x> PMID: 16643196
45. Langford JL, Webster KE, Feller JA. A prospective longitudinal study to assess psychological changes following anterior cruciate ligament reconstruction surgery. *Br J Sports Med*. 2009; 43(5):377–81. <https://doi.org/10.1136/bjism.2007.044818> PMID: 19019910
46. Morrey MA, Stuart MJ, Smith AM, Wiese-Bjornstal DM. A longitudinal examination of athletes' emotional and cognitive responses to anterior cruciate ligament injury. *Clin J Sport Med*. 1999; 9(2):63–9. PMID: 10442619
47. Tripp DA, Stanish W, Ebel-Lam A, Brewer BW, Birchard J. Fear of reinjury, negative affect, and catastrophizing predicting return to sport in recreational athletes with anterior cruciate ligament injuries at 1 year postsurgery. *Rehabilitation Psychology*. 2007; 52(1):74–81.
48. Gobbi A, Francisco R. Factors affecting return to sports after anterior cruciate ligament reconstruction with patellar tendon and hamstring graft: a prospective clinical investigation. *Knee Surg Sports Traumatol Arthrosc*. 2006; 14(10):1021–8. <https://doi.org/10.1007/s00167-006-0050-9> PMID: 16496124
